# Supplementary material for: Targeting isoaspartate-modified Aβ rescues behavioral deficits in transgenic mice with Alzheimer’s disease-like pathology
Source: PubMed Central journal article supplement (PMC7666770; doi:10.1186/s13195-020-00719-x), 2020-11-14

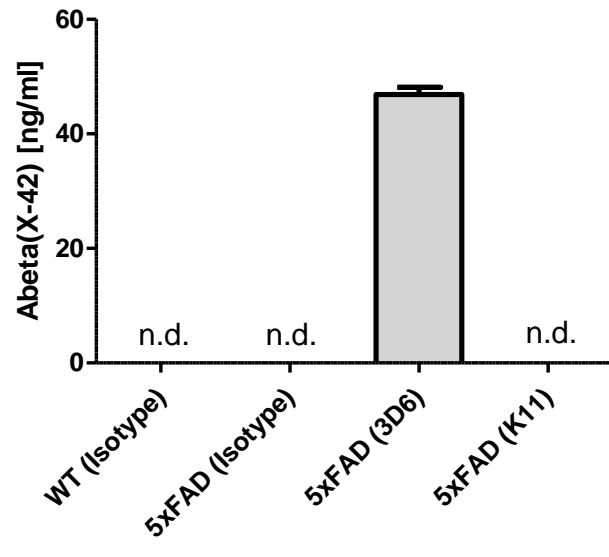

Supplement: 13195_2020_719_MOESM11_ESM.pdf [file 13195_2020_719_MOESM11_ESM.pdf]
