# Supplementary material for: Targeting isoaspartate-modified Aβ rescues behavioral deficits in transgenic mice with Alzheimer’s disease-like pathology
Source: Springer Nature journal article supplement (doi:10.1186/s13195-020-00719-x), 2020-11-14
Supplement: MOESM1 [file 18587052]

| <b>Antibody</b> | <b>Subtype</b> | <b>Kd value isoD7-A<math>\beta</math>(1-18)<br/>[nM]</b> | <b>Kd value A<math>\beta</math>(1-18)<br/>[nM]</b> |
|-----------------|----------------|----------------------------------------------------------|----------------------------------------------------|
| K11             | IgG1           | 6.31                                                     | 2700                                               |
| K16             | IgG1           | 54.8                                                     | 3990                                               |
| K23             | IgG1           | 4.92                                                     | 378                                                |
| K29             | IgG2b          | 136                                                      | 9009                                               |
| K119            | IgG2a          | 68.5                                                     | ~8000                                              |
| K129            | IgG1           | 87.7                                                     | Not detectable                                     |
| K211            | IgG1           | 208                                                      | ~12100                                             |
