# Supplementary material for: Targeting isoaspartate-modified Aβ rescues behavioral deficits in transgenic mice with Alzheimer’s disease-like pathology
Source: Springer Nature journal article supplement (doi:10.1186/s13195-020-00719-x), 2020-11-14

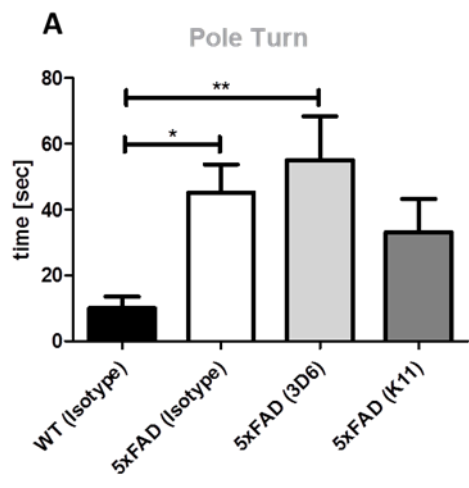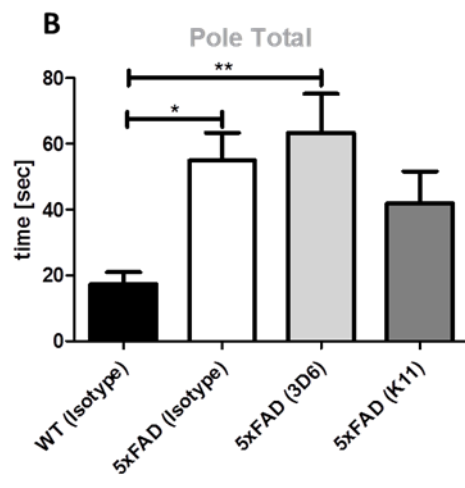

Supplement: MOESM10 [file 18587052]
